# Supplementary material for: OCTAL: Optimal Completion of gene trees in polynomial time
Source: PubMed Central journal article supplement (PMC5853121; doi:10.1186/s13015-018-0124-5), 2018-03-15
Supplement: 13015_2018_124_MOESM1_ESM.pdf [file 13015_2018_124_MOESM1_ESM.pdf]

## Additional Materials

### OCTAL: Optimal Completion of Gene Trees in Polynomial Time

Sarah Christensen, Erin K. Molloy, Pranjal Vachaspati, and Tandy Warnow

#### List of Figures

|    |                                                                                                                                                       |   |
|----|-------------------------------------------------------------------------------------------------------------------------------------------------------|---|
| S1 | The performance of OCTAL and ASTRAL-II across replicate datasets with the matching distance evaluation criterion . . . . .                            | 2 |
| S2 | The performance of OCTAL and ASTRAL-II across replicate datasets with the quartet distance evaluation criterion . . . . .                             | 3 |
| S3 | The impact of degree of missing data on the relative performance of OCTAL and ASTRAL-II with the matching distance evaluation criterion . . . . .     | 4 |
| S4 | The impact of degree of missing data on the relative performance of OCTAL and ASTRAL-II with the quartet distance evaluation criterion . . . . .      | 5 |
| S5 | The impact of gene tree estimation error on the relative performance of OCTAL and ASTRAL-II with the matching distance evaluation criterion . . . . . | 6 |
| S6 | The impact of gene tree estimation error on the relative performance of OCTAL and ASTRAL-II with the quartet distance evaluation criterion . . . . .  | 7 |

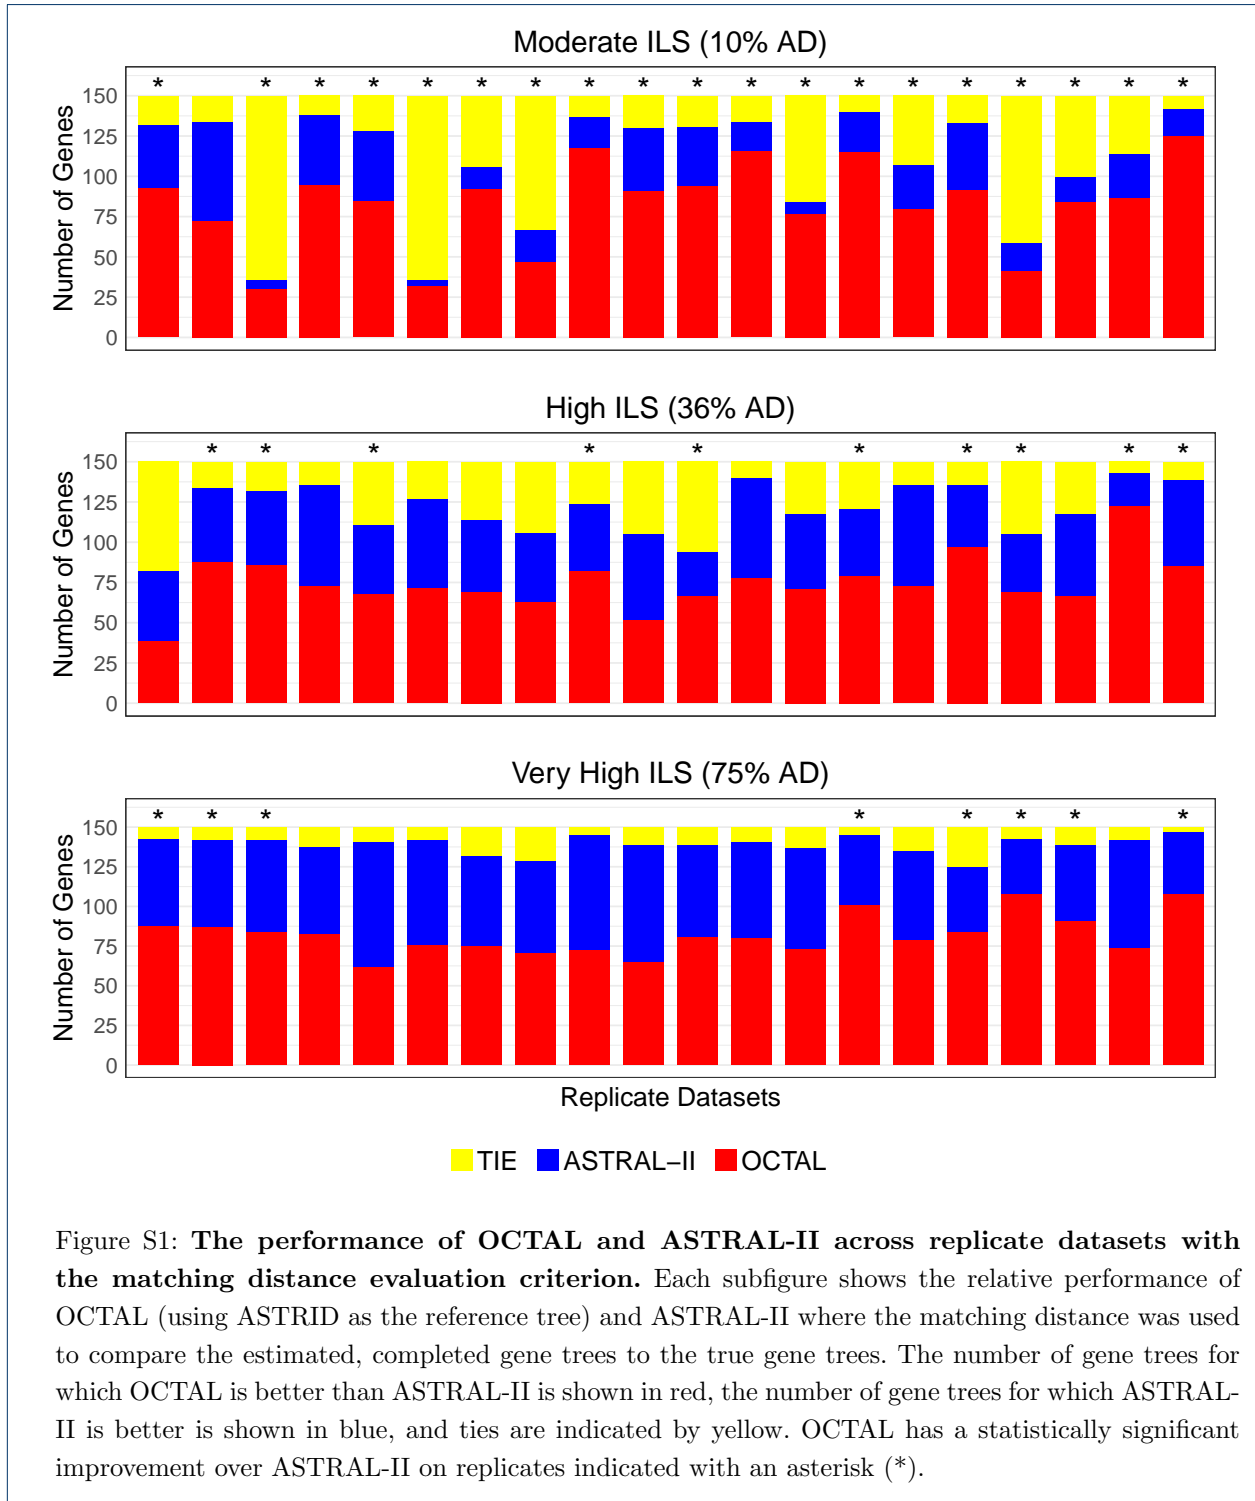

Figure S1: **The performance of OCTAL and ASTRAL-II across replicate datasets with the matching distance evaluation criterion.** Each subfigure shows the relative performance of OCTAL (using ASTRID as the reference tree) and ASTRAL-II where the matching distance was used to compare the estimated, completed gene trees to the true gene trees. The number of gene trees for which OCTAL is better than ASTRAL-II is shown in red, the number of gene trees for which ASTRAL-II is better is shown in blue, and ties are indicated by yellow. OCTAL has a statistically significant improvement over ASTRAL-II on replicates indicated with an asterisk (\*).

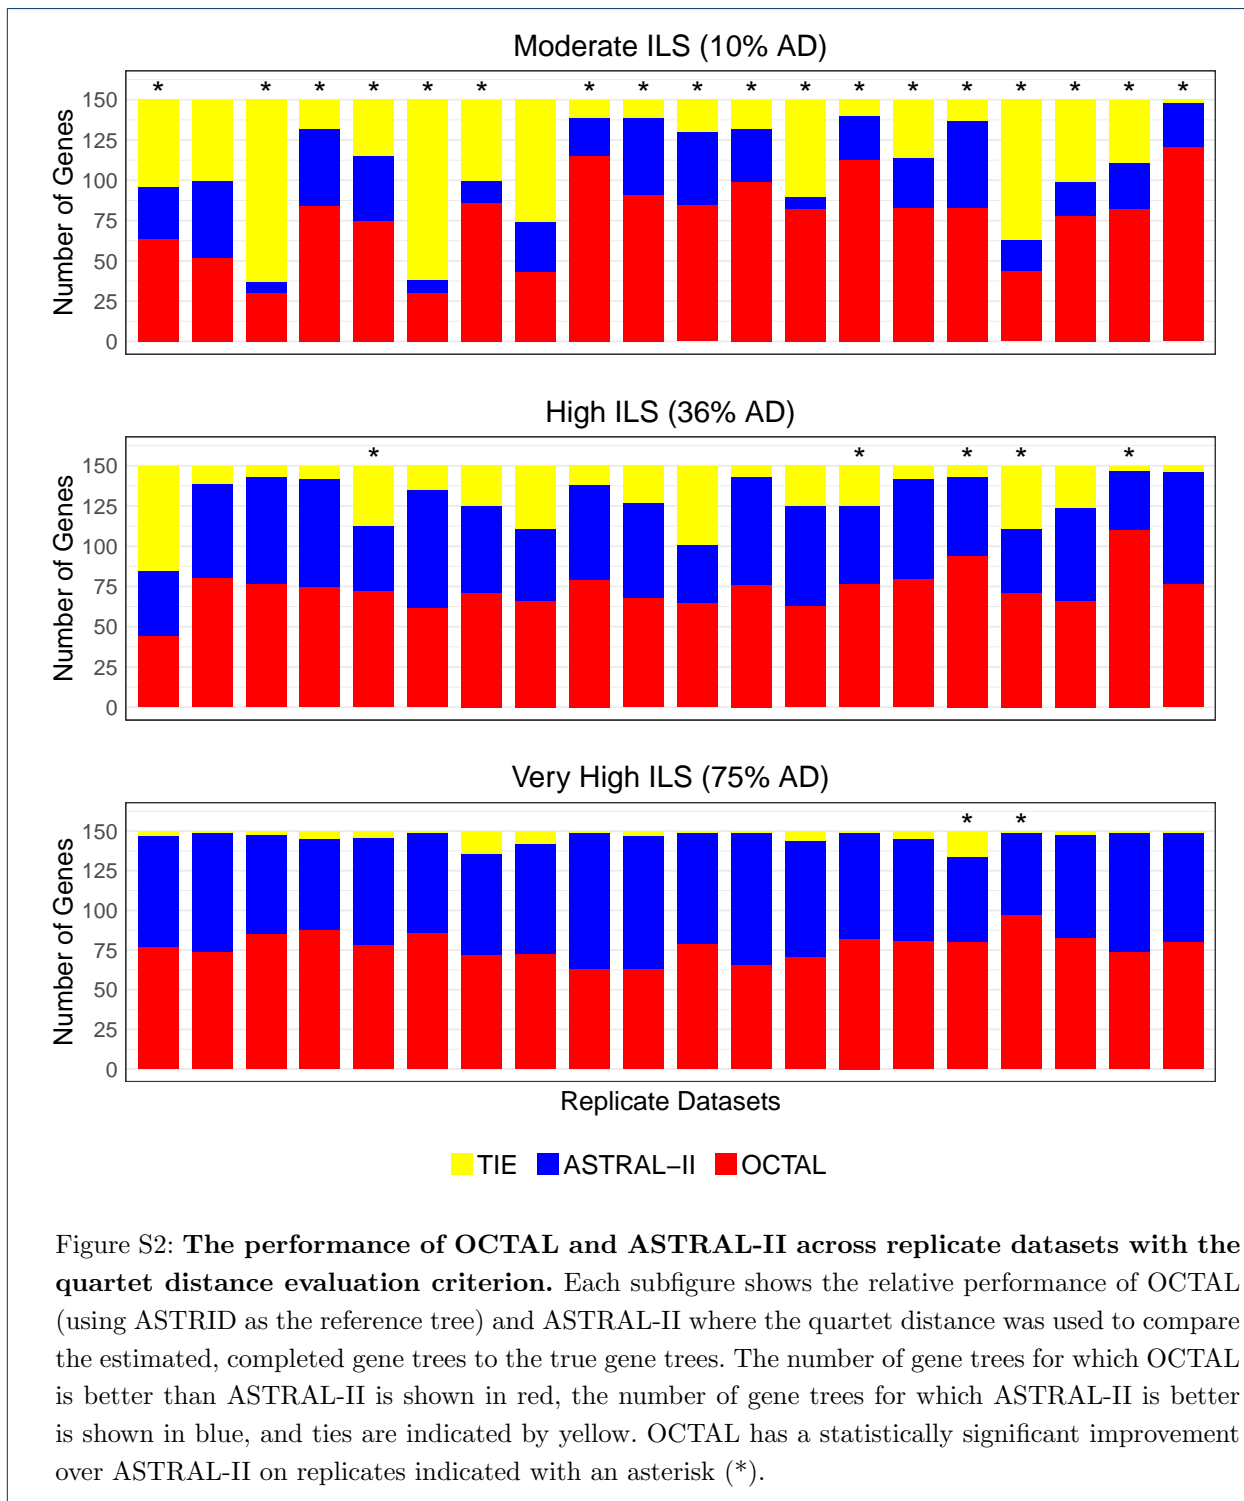

Figure S2: The performance of OCTAL and ASTRAL-II across replicate datasets with the quartet distance evaluation criterion. Each subfigure shows the relative performance of OCTAL (using ASTRID as the reference tree) and ASTRAL-II where the quartet distance was used to compare the estimated, completed gene trees to the true gene trees. The number of gene trees for which OCTAL is better than ASTRAL-II is shown in red, the number of gene trees for which ASTRAL-II is better is shown in blue, and ties are indicated by yellow. OCTAL has a statistically significant improvement over ASTRAL-II on replicates indicated with an asterisk (\*).

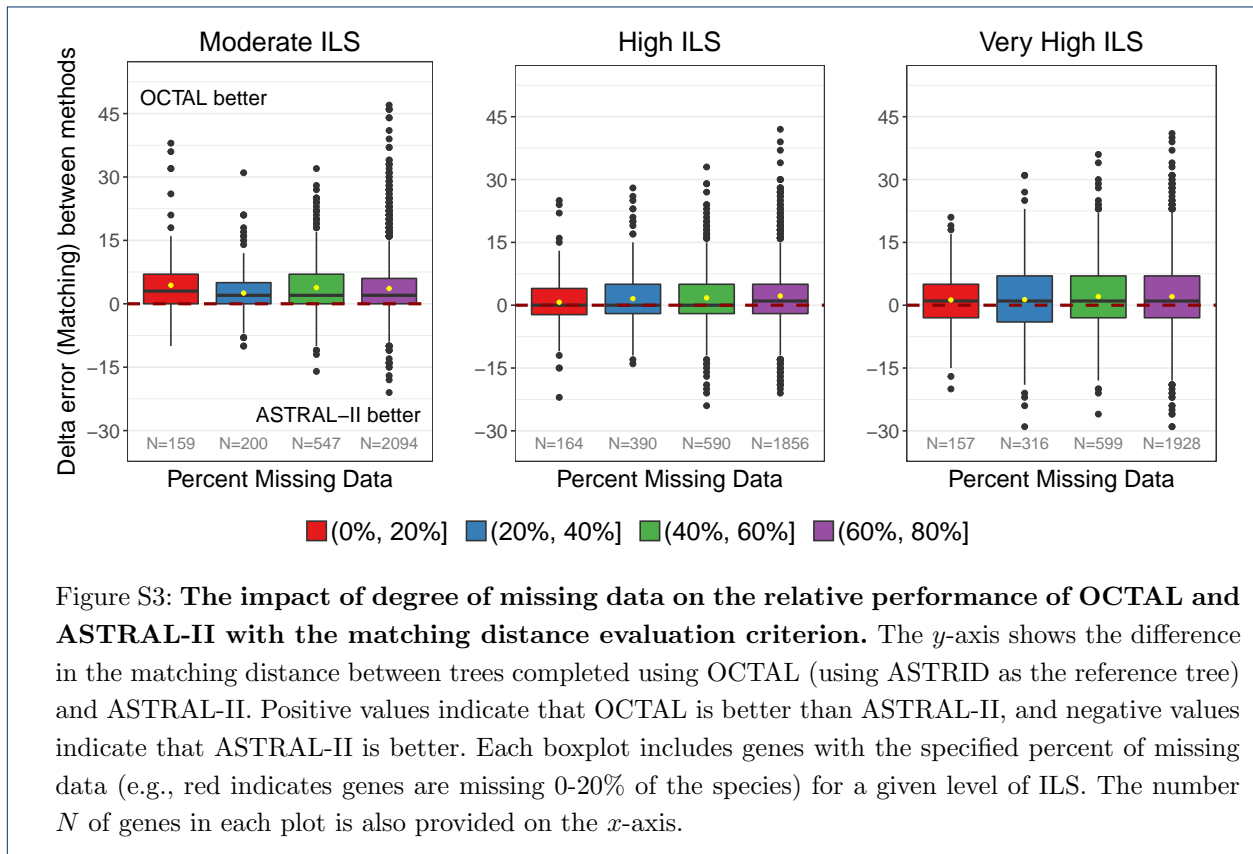

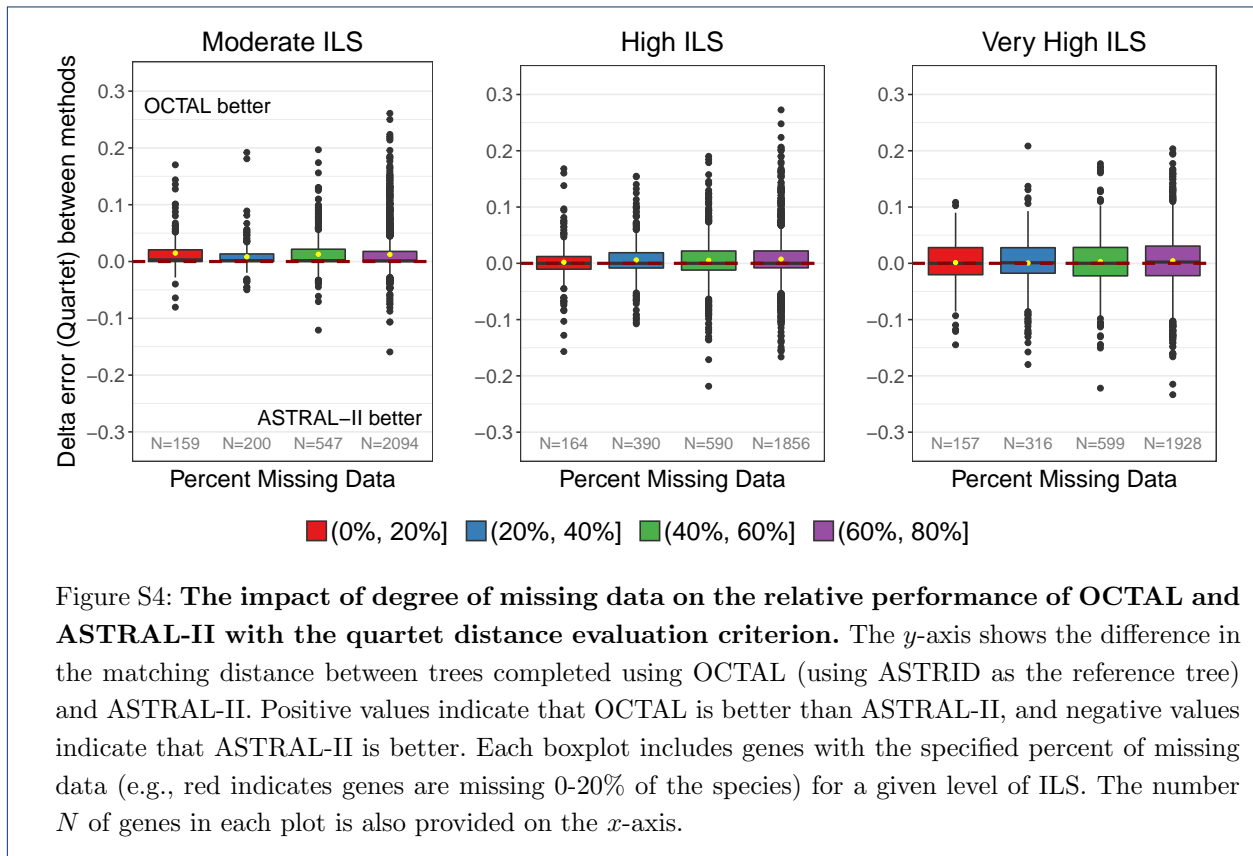

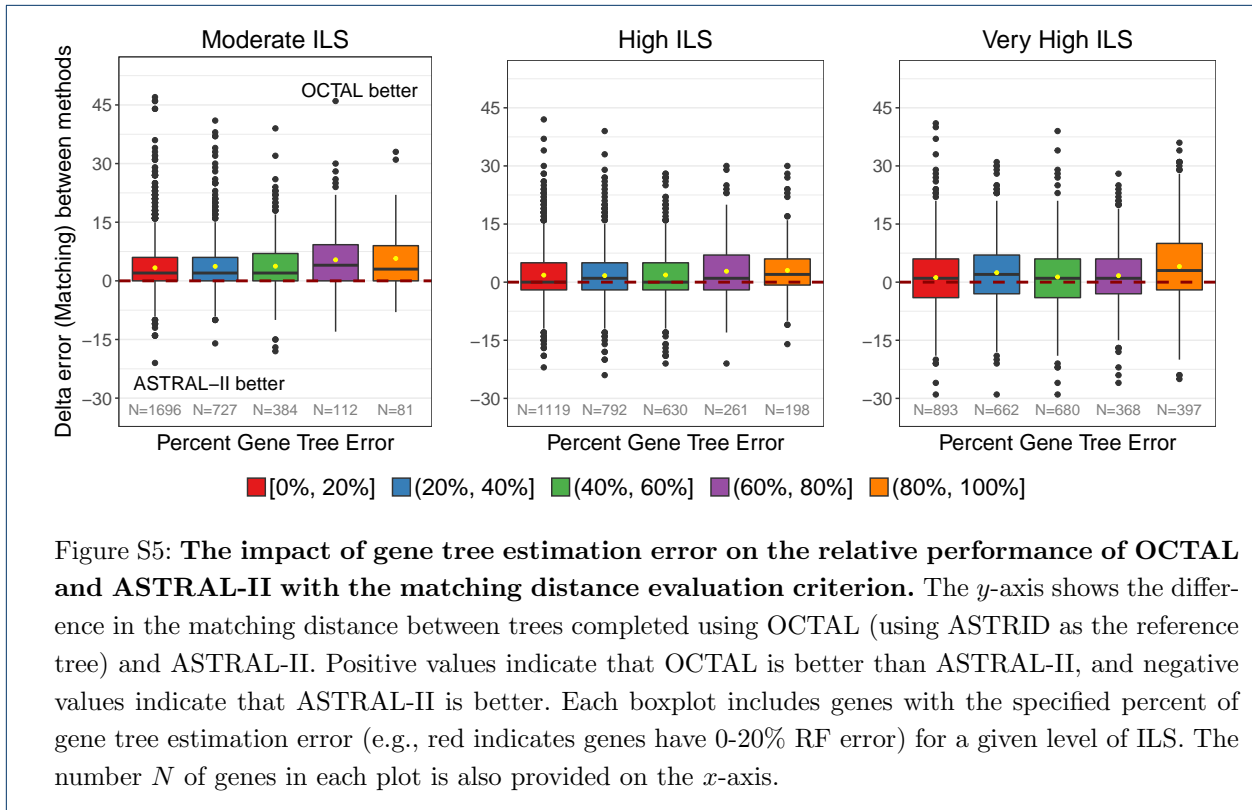

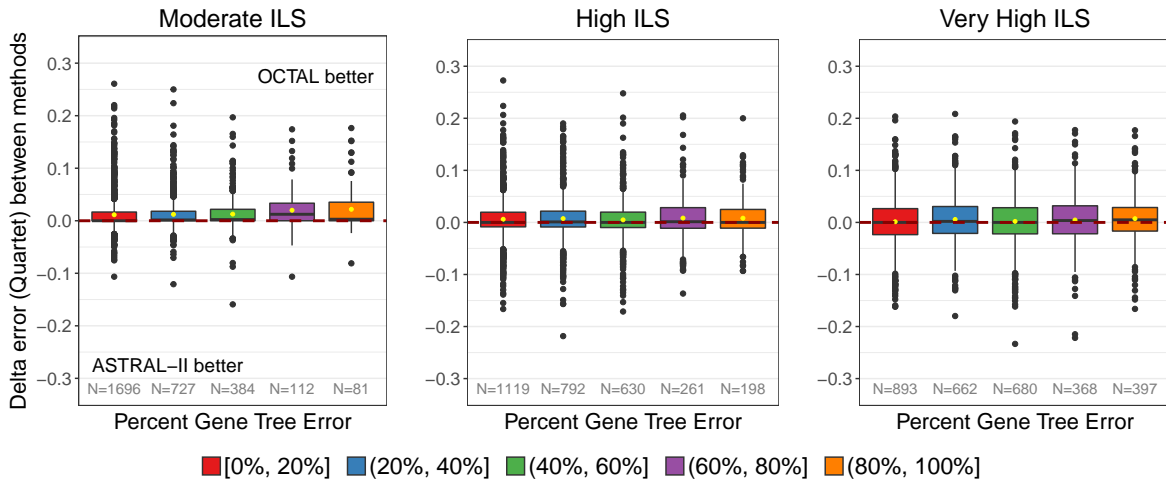

Figure S6: **The impact of gene tree estimation error on the relative performance of OCTAL and ASTRAL-II with the quartet distance evaluation criterion.** The *y*-axis shows the difference in the quartet distance between trees completed using OCTAL (using ASTRID as the reference tree) and ASTRAL-II. Positive values indicate that OCTAL is better than ASTRAL-II, and negative values indicate that ASTRAL-II is better. Each boxplot includes genes with the specified percent of gene tree estimation error (e.g., red indicates genes have 0-20% RF error) for a given level of ILS. The number *N* of genes in each plot is also provided on the *x*-axis.
